# Supplementary material for: T329S Mutation in the FMO3 Gene Alleviates Lipid Metabolic Diseases in Chickens in the Late Laying Period
Source: MDPI journal article supplement (doi:10.3390/ani12010048), 2021-12-27
Supplement: s1 [file s1]

**Table S1.** Composition and nutrient level of basal diet

| Item                                  | Basal Diet |
|---------------------------------------|------------|
| <i>Ingredient (%)</i>                 |            |
| Corn                                  | 61.95      |
| Soybean meal                          | 27.50      |
| Soybean oil                           | 0.75       |
| Limestone                             | 8.50       |
| Sodium Salt                           | 0.30       |
| Cholesterol                           | -          |
| Premix <sup>1</sup>                   | 1.00       |
| Total                                 | 100.00     |
| <i>Nutrient level<sup>2</sup> (%)</i> |            |
| ME (MJ/kg)                            | 11.34      |
| Crude protein                         | 15.52      |
| Lysine                                | 0.71       |
| Methionine                            | 0.36       |
| Threonine                             | 0.66       |
| Methionine + Cysteine                 | 0.53       |
| Calcium                               | 3.40       |
| Available phosphorus                  | 0.28       |

<sup>1</sup>Premix provided the following per kilogram of diets: Vitamin A, 10000 IU; Vitamin D<sub>3</sub>, 3000 IU; Vitamin E, 30 IU; Vitamin K<sub>3</sub> 1 mg; Vitamin B<sub>1</sub>, 1 mg; Vitamin B<sub>2</sub>, 6 mg; Vitamin B<sub>6</sub>, 3 mg; Vitamin B<sub>12</sub>, 0.01 mg; biotin, 0.1 mg; folic acid, 0.3 mg; calcium pantothenate, 10 mg; niacin, 45 mg; Cu (as copper sulfate), 8 mg; Fe (as ferrous sulfate), 80 mg; Mn (as manganese sulfate), 100 mg; Zn (as zinc sulfate), 60 mg; I (as potassium iodide), 1 mg; Se (as sodium selenite), 0.3 mg.

<sup>2</sup>Crude protein and calcium levels were analyzed. Each value was based on triplicate determinations, but all other nutrient levels were calculated.
